# Supplementary material for: Importance of gas-particle partitioning of ammonia in haze formation in the rural agricultural environment
Source: Copernicus journal article supplement (doi:10.5194/acp-20-7259-2020), 2020-06-23
Supplement: Supplementary file 1 [file acp-20-7259-2020-supplement.pdf]

Supplement of Atmos. Chem. Phys., 20, 7259–7269, 2020  
<https://doi.org/10.5194/acp-20-7259-2020-supplement>  
© Author(s) 2020. This work is distributed under  
the Creative Commons Attribution 4.0 License.

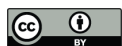

*Supplement of*

## **Importance of gas-particle partitioning of ammonia in haze formation in the rural agricultural environment**

**Jian Xu et al.**

*Correspondence to:* Kan Huang ([huangkan@fudan.edu.cn](mailto:huangkan@fudan.edu.cn))

The copyright of individual parts of the supplement might differ from the CC BY 4.0 License.

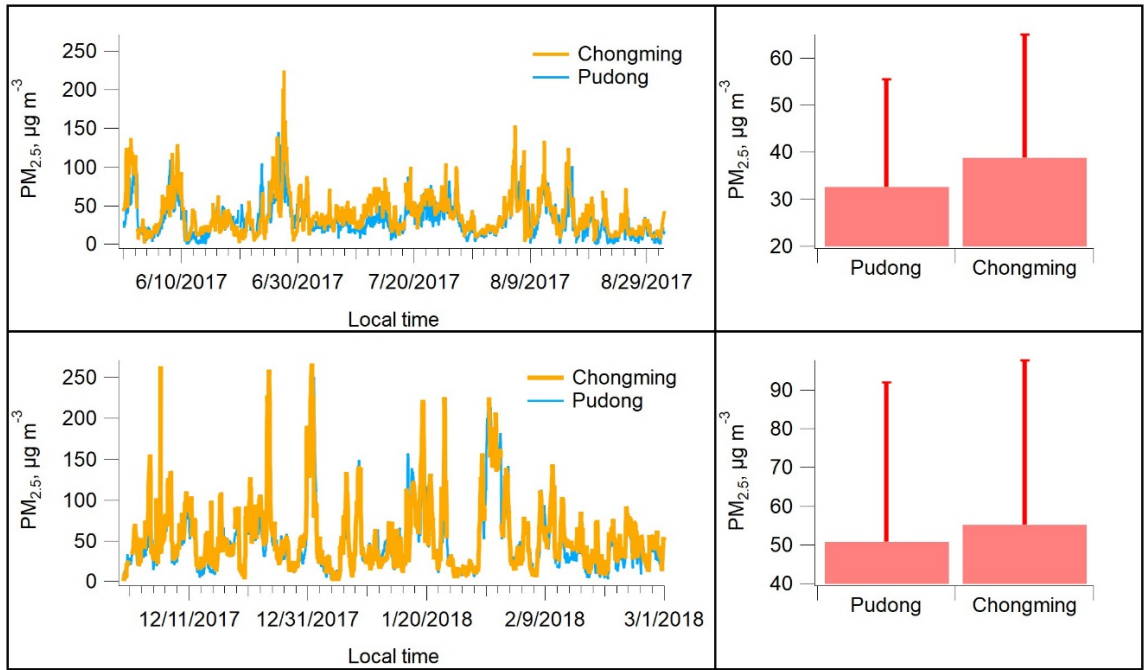

**Figure S1:** PM<sub>2.5</sub> at Chongming (rural) and Pudong (urban) in summer (top) and winter (bottom).

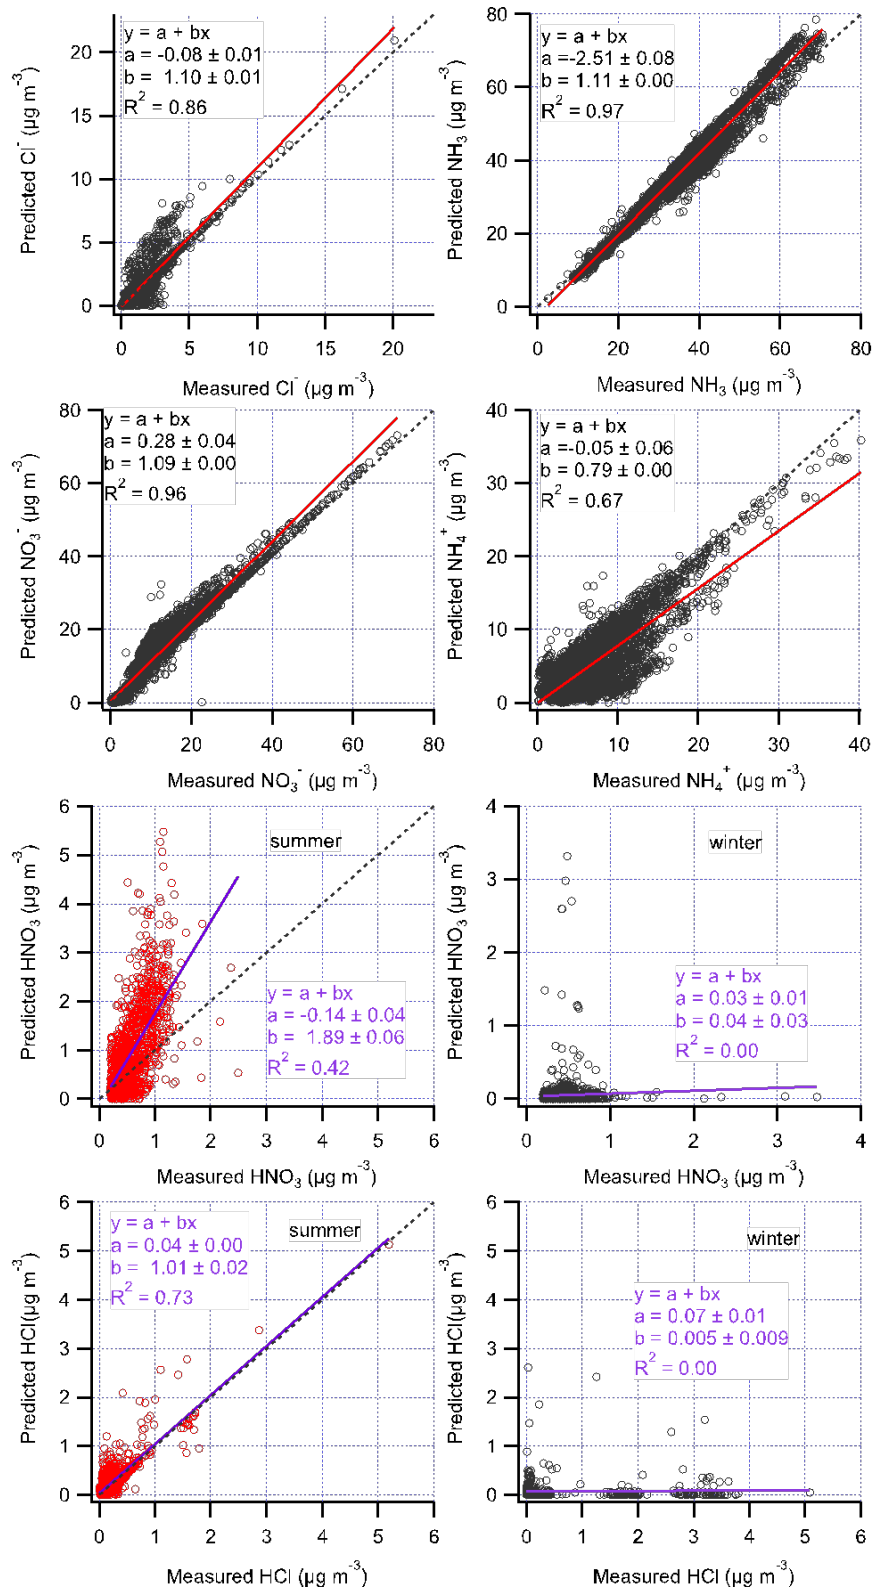

**Figure S2:** Comparison of predicted and measured  $\text{Cl}^-$ ,  $\text{NO}_3^-$ ,  $\text{NH}_3$ ,  $\text{NH}_4^+$ , and  $\text{HNO}_3$  and  $\text{HCl}$  in summer and in winter, respectively. Orthogonal distance regression (ODR) fits with  $\pm 1\sigma$  are shown.

**Table S1:** District level emission (unit: Mg/year) of NH<sub>3</sub>, SO<sub>2</sub>, and NO<sub>x</sub> in Shanghai based on the MEIC emission inventory (MEIC, [www.meicmodel.org](http://www.meicmodel.org))

| Name             | Agriculture<br>_NH <sub>3</sub> | Agriculture<br>_NO <sub>x</sub> | Agriculture<br>_SO <sub>2</sub> | All<br>_NH <sub>3</sub> | All<br>_NO <sub>x</sub> | All_SO <sub>2</sub> |
|------------------|---------------------------------|---------------------------------|---------------------------------|-------------------------|-------------------------|---------------------|
| Baoshan          | 371.7                           | 0                               | 0                               | 679.7                   | 33924.2                 | 15352.2             |
| Changning        | 59.4                            | 0                               | 0                               | 113.4                   | 4850.9                  | 2298.9              |
| <b>Chongming</b> | <b>3057.5</b>                   | <b>0</b>                        | <b>0</b>                        | <b>3242.6</b>           | <b>18543</b>            | <b>7699</b>         |
| Fengxian         | 2620.7                          | 0                               | 0                               | 2747.9                  | 11981.3                 | 5646.3              |
| Hongkou          | 28.5                            | 0                               | 0                               | 51.9                    | 2579.7                  | 1176.4              |
| Huangpu          | 35.3                            | 0                               | 0                               | 64.5                    | 2629                    | 1247.5              |
| Jiading          | 1183.5                          | 0                               | 0                               | 1616.3                  | 36659.2                 | 15866.7             |
| Jinshan          | 2343.8                          | 0                               | 0                               | 2460.4                  | 11107.4                 | 5107.1              |
| Jingan           | 47.7                            | 0                               | 0                               | 89.7                    | 4282                    | 1960.2              |
| Putuo            | 83.1                            | 0                               | 0                               | 149.5                   | 6590.2                  | 3025.4              |
| Pudong           | 4184.5                          | 0                               | 0                               | 4770.5                  | 66681.2                 | 33267.8             |
| Qingpu           | 1578.5                          | 0                               | 0                               | 1802.9                  | 17867                   | 8333.1              |
| Songjiang        | 1810.4                          | 0                               | 0                               | 2130.5                  | 28012.5                 | 13287.7             |
| Xuhui            | 88.1                            | 0                               | 0                               | 168.1                   | 7193                    | 3408.9              |
| Yangpu           | 77.3                            | 0                               | 0                               | 117.8                   | 6134.7                  | 3091.3              |
| Minhang          | 851.6                           | 0                               | 0                               | 1317.2                  | 42765.9                 | 20401               |
| Total            | 18421.6                         | 0                               | 0                               | 21522.9                 | 301801.2                | 141169.5            |
